# Supplementary material for: Study on the applicability of pressurized physically activated carbon as an adsorbent in adsorption heat pumps
Source: Royal Society of Chemistry journal article supplement (doi:10.1039/d1ra08395c), 2022-01-01
Supplement: d1ra08395c1.pdf [file d1ra08395c1.pdf]

## Electronic supplementary information (ESI)

### Study on the applicability of pressurized physically activated carbon as an adsorbent in adsorption heat pumps

Hyeonseok Yi, Koji Nakabayashi, Seong-Ho Yoon, Jin Miyawaki\*

#### 1. Raman spectroscopy

Raman spectra were obtained using a Raman spectrometer (NRS-3000, JASCO, Japan) employing a 532-nm Ar-ion laser as the excitation source. Intensity ratio of D band and G band,  $I_D/I_G$ , was calculated from the peak intensities at  $1350\text{ cm}^{-1}$  (D band) and  $1580\text{ cm}^{-1}$  (G band) in the Raman spectra.

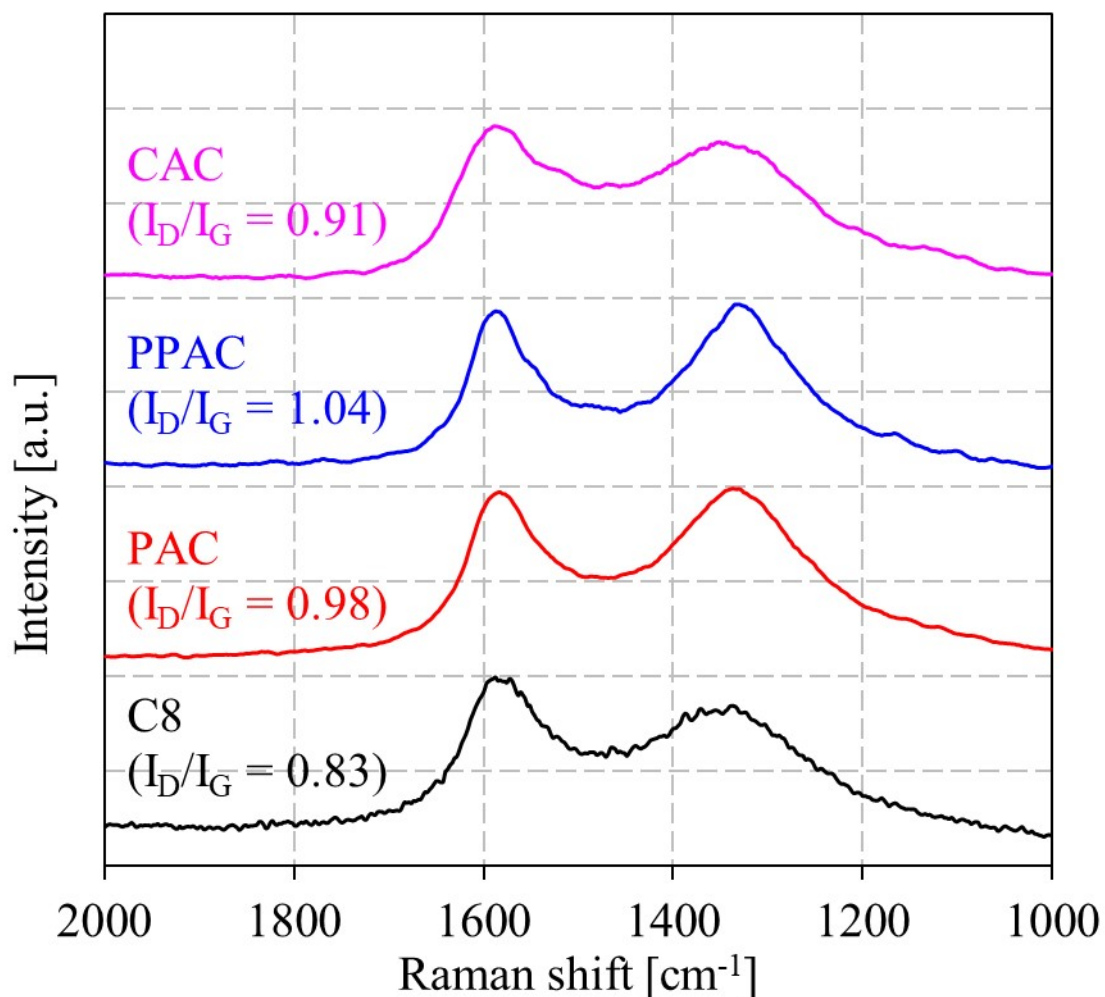

**Figure S1.** Raman spectra of starting carbonized material (C6), and the activated carbons derived via different activation methods (PAC, PPAC, and CAC).

## 2. Elemental composition

Elemental compositions of samples were analyzed using a CHN analyzer (MT-5, Yanako, Japan). The assay of O content ( $O_{\text{diff}}$ ) was defined by subtracting the sum of the contents of C, H, and N from 100%.

**Table S1.** Elemental composition of starting carbonized material (C6), and the activated carbons derived via different activation methods (PAC, PPAC, and CAC).

| Sample | C [wt.%] | H [wt.%] | N [wt.%] | $O_{\text{diff}}$ [wt.%] <sup>a</sup> | Ash [wt.%]        | $O_{\text{diff}}/C$ |
|--------|----------|----------|----------|---------------------------------------|-------------------|---------------------|
| C6     | 90.19    | 2.23     | 0.22     | 7.36                                  | n.d. <sup>b</sup> | 0.062               |
| PAC    | 96.53    | 0.33     | 0.08     | 3.06                                  | n.d. <sup>b</sup> | 0.024               |
| PAPC   | 93.66    | 0.34     | 0.09     | 5.91                                  | n.d. <sup>b</sup> | 0.047               |
| CAC    | 95.15    | 0.02     | 0.14     | 4.69                                  | n.d. <sup>b</sup> | 0.037               |

<sup>a</sup>  $O_{\text{diff}} = 100 - (H + C + N)$ .

<sup>b</sup> Not detected.
